# Supplementary material for: Multifunctional nanocomposites based on graphite-phase carbon nitride quantum dot-silver nanospheres for combined photothermal–photodynamic anti-tumor therapy
Source: Royal Society of Chemistry journal article supplement (doi:10.1039/d3nj04135b), 2024-01-01
Supplement: d3nj04135b1.pdf [file d3nj04135b1.pdf]

## Supporting Information

# Multifunctional nanocomposites based on graphite-phase carbon nitride quantum dots-silver nanospheres for combined photothermal-photodynamic anti-tumor therapy

Wenjing He<sup>a</sup>, Ying Jin<sup>b</sup>, Baoping Wang<sup>c</sup>, Jie Tan<sup>d</sup>, Wenjia Yan<sup>e</sup>, Hong Xiao<sup>e</sup>, Martin M.F. Choi<sup>f</sup>, and Wei Bian<sup>a,b,g\*</sup>

<sup>a</sup>Department of Biochemistry and Molecular Biology, School of Basic Medical Science, Shanxi Medical University, Taiyuan 030001, China.

<sup>b</sup>Department of Pathology Xinzhou People's Hospital, Xinzhou 034000, China.

<sup>c</sup>People's Hospital of Lvliang, Lvliang 033099, China.

<sup>d</sup>Department of Traditional Chinese Medicine, the First Hospital of Shanxi Medical University, Taiyuan 030001, China.

<sup>e</sup>Department of Pathology, the First Hospital of Shanxi Medical University, Taiyuan 030001, China.

<sup>f</sup>Bristol Chinese Christian Church, c/o Tyndale Baptist Church, 137-139 Whiteladies Road, Bristol BS8 2QG, UK.

<sup>g</sup>Key Laboratory of Cellular Physiology at Shanxi Medical University, Ministry of Education, Taiyuan 030001, China.

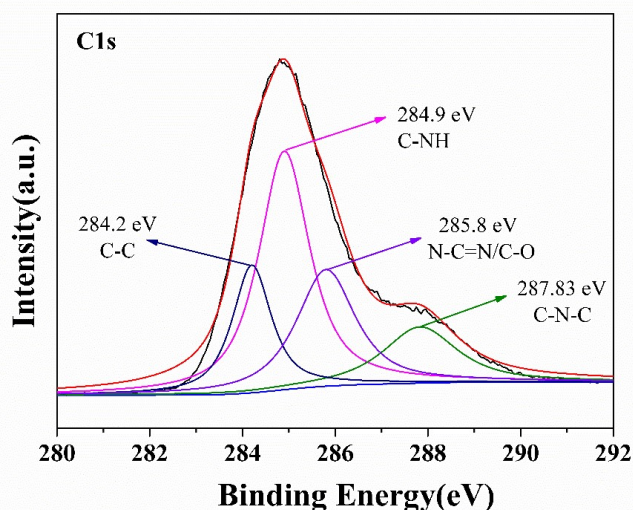

Figure S1. High-resolution C1s spectrum of g-CNQDs@AgNSs.

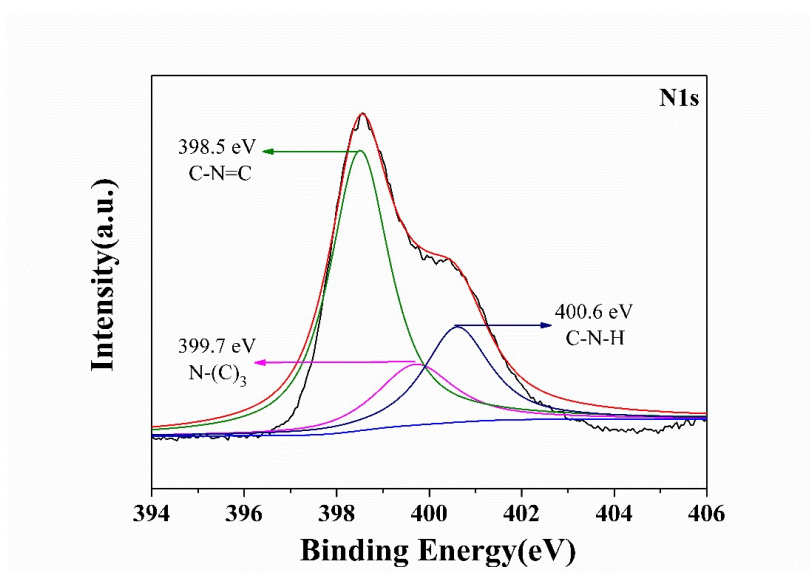

**Figure S2.** High-resolution N1s spectrum of g-CNQDs@AgNSs.

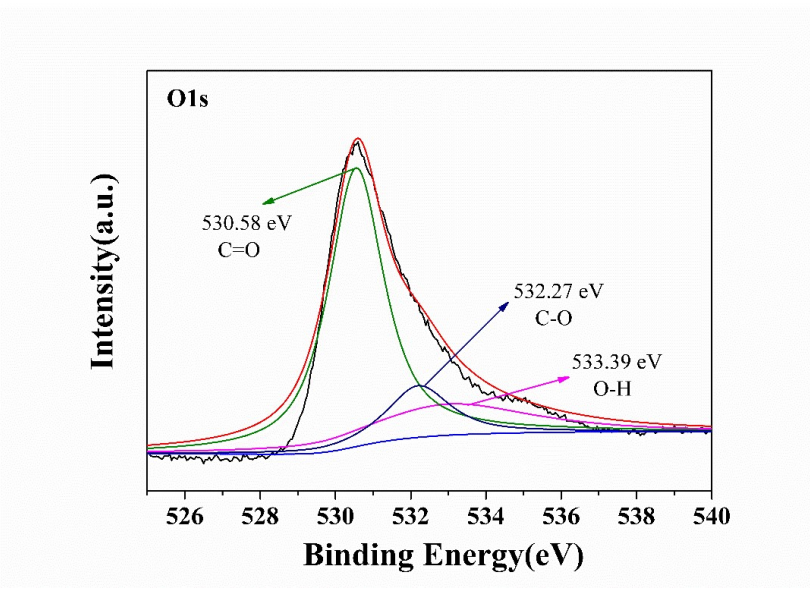

**Figure S3.** High-resolution O1s spectrum of g-CNQDs@AgNSs.

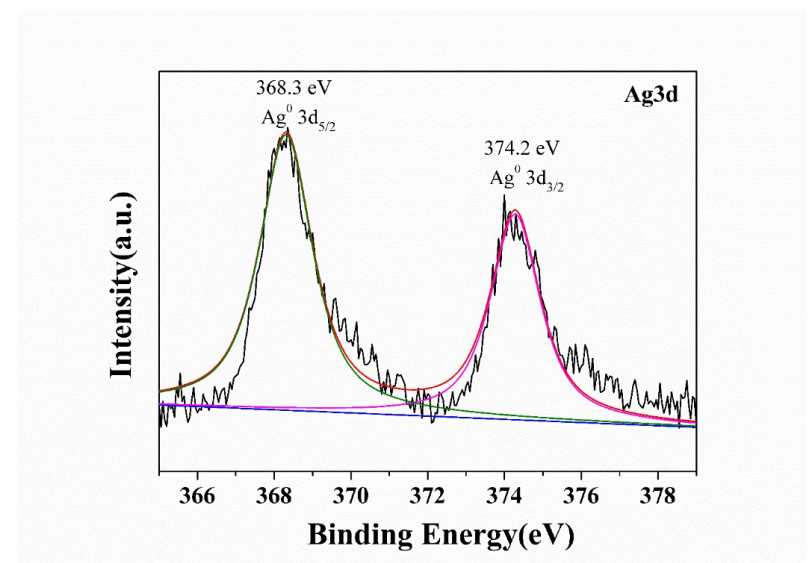

**Figure S4.** High-resolution Ag3d spectrum of g-CNQDs@AgNSs.

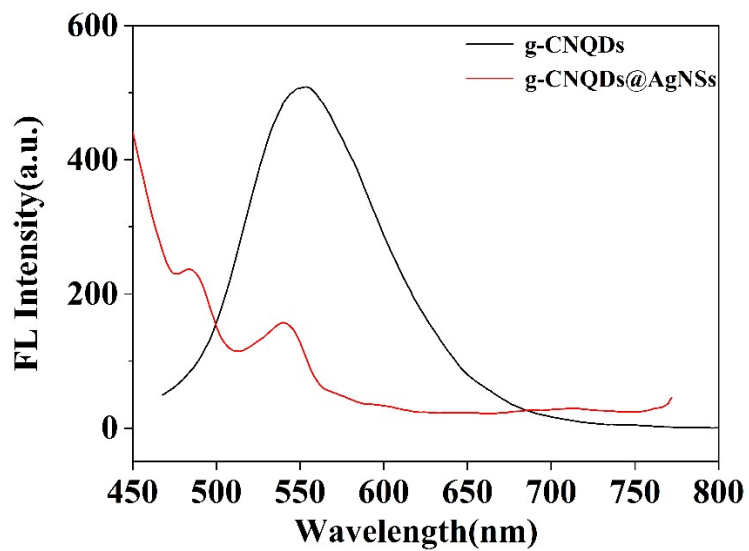

**Figure S5.** Fluorescence spectra of g-CNQDs and g-CNQDs@AgNSs.

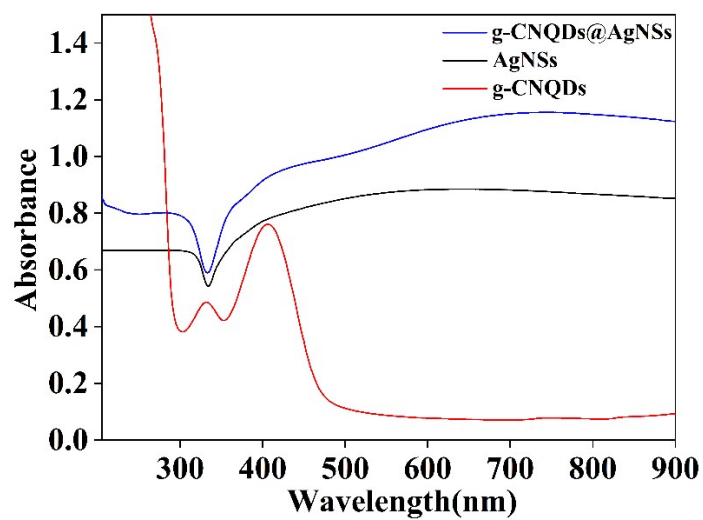

**Figure S6.** UV-visible absorption spectra of g-CNQDs, AgNSs and g-CNQDs@AgNSs.

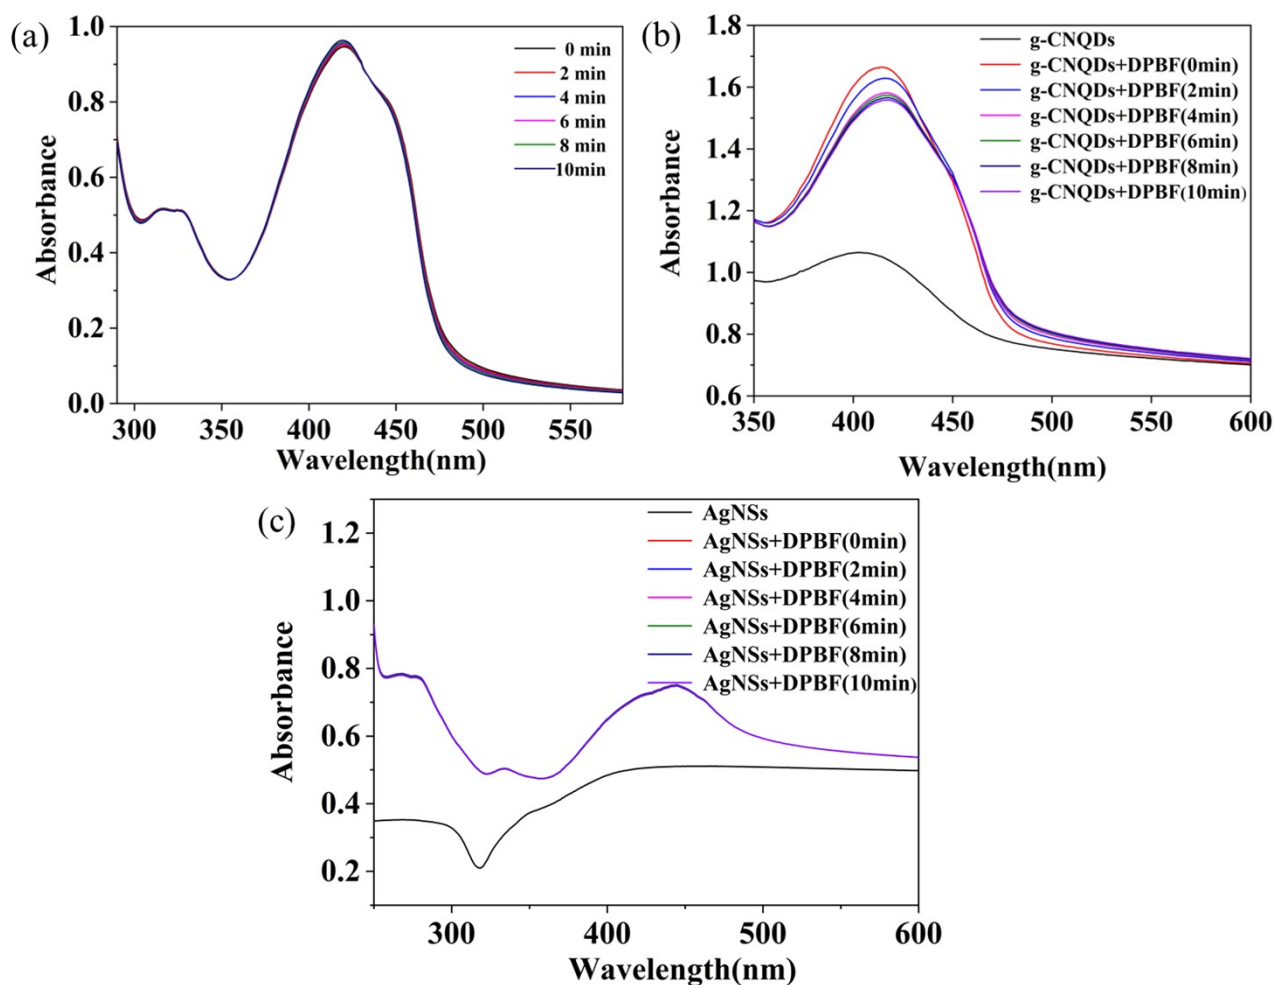

**Figure S7.** Absorbance of (a) DPBF, (b) g-CNQDs and DPBF, and (c) AgNSs and DPBF at various times under NIR irradiation.

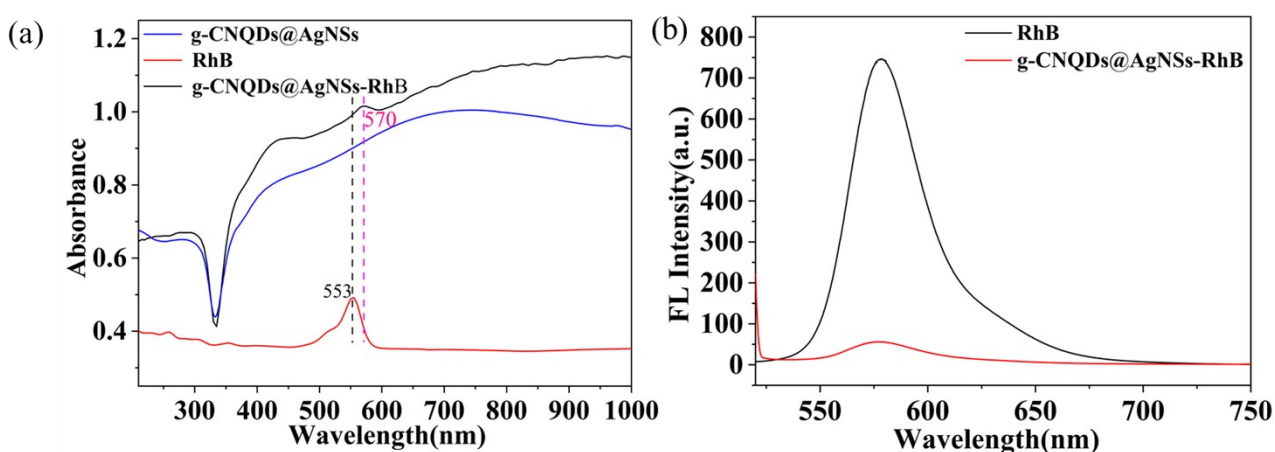

**Figure S8.** (a) UV-visible absorption spectra of g-CNQDs@AgNSs, RhB, and g-CNQDs@AgNSs-RhB. (b) Fluorescence spectra of RhB and g-CNQDs@AgNSs-RhB.

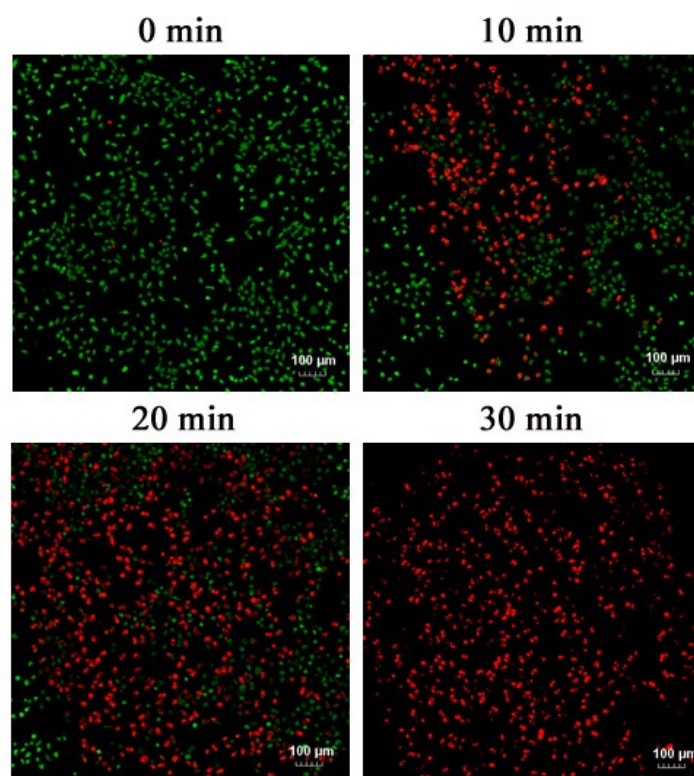

**Figure S9.** CLSM images of MCF-7 cells incubated by 250  $\mu\text{g}/\text{mL}$  g-CNQDs@AgNSs and irradiated with NIR at various durations (0–10 min).
